# Supplementary material
Source: PubMed Central journal article supplement (PMC5714749)
Supplement: ajcr0007-2199-f4.pdf [file ajcr0007-2199-f4.pdf]

## Supplements

### Materials and methods

#### *Immunogold assay*

Exosomes were fixed in 2% (w/v) paraformaldehyde and later loaded onto formvar-coated nickel grids (TAAB Laboratories Equipment Ltd.) and dried thoroughly at room temperature. After rinsing with PBS 3 times, the grids were then incubated with 0.05 M glycine/PBS for 40 min to quench free aldehyde groups and permeabilized with 0.2% (v/v) Triton X-100/PBS for 5 min. Grids were then washed in PBS 3 times with each wash lasting for 10 minutes. In order to prevent nonspecific binding, samples were blocked with PBS containing 5% (w/v) BSA for 30 min, then washed twice in incubation buffer (0.2% (w/v) BSA in PBS) for 5 min and incubated overnight at 4°C with 50 µg/ml anti-CD63 (Genetex) antibody in PBS/0.5% BSA. After primary antibody incubation, samples were then washed and stained with gold-labelled secondary goat anti-rabbit antibody (Aurion) for 2 hours at room temperature and postfixed with 1% glutaraldehyde for 10 min. After secondary antibody incubations, grids were washed in milli-Q water for 10 min, three times and contrasted in 1% filtered uranyl acetate solution for 5 min. Grids were stored when fully dried and imaging is performed using a Hitachi H-7100 transmission electron microscope equipped with a Gatan 832 digital camera (Gatan Inc.) at an acceleration voltage of 100 KV.

#### *ELISA*

Levels of TGF-β1 in plasma or in exosome were quantified employing a Quantikine ELISA kit as described by the manufacturer (R&D Systems). For each assay, 10 µl of exosomes was used. Prior to verifying the levels of TGF-β1 in plasma and in exosomes, samples were first acidified to activate latent TGF-β1 with 1 N HCl for 10 minutes at room temperature and neutralized with an equal volume of 1.2 N NaOH and 0.5 M HEPES.

### Supplementary results

#### *The expression of TGF-β in gastric cancer*

A preliminary CDNA microarray was performed to investigate gene expression in 6 paired tumor and non-tumorous tissue of gastric cancer. Among the 255 genes identified, 12 genes were found to be up-regulated, while 13 genes were down-regulated in tumors ([Supplemental Table 1](#)). TGF-β1, which encode transforming growth factor beta 1, was one of the up-regulated genes in gastric cancer tissues, especially in those of advanced stages. Immunohistochemical staining of TGF-β in paraffin-embedded GC tissues were performed to validate the microarray finding. The non-tumorous gastric epithelium showed little or no TGF-β expression. The tumorous part of GC expressed obvious TGF-β staining, and the staining intensities of TGF-β in tumors increased with the pathological stages of GC ([Supplementary Figure 2](#)).

## Exosomes and gastric cancer metastasis

**Supplementary Table 1.** Differentially expressed genes in gastric cancer tissue-microarray analysis

| Up-regulated  | Down-regulated |
|---------------|----------------|
| C1QB          | CDC42          |
| C1R           | HSH2D          |
| C1S           | IL10RB         |
| C2            | IL13           |
| HIF1A         | IL1B           |
| IL18          | IL9            |
| LIMK1         | MAP2K1         |
| RIPK2         | MAP3K9         |
| STAT1         | MAPKAPK2       |
| TGF $\beta$ 1 | MX2            |
| TLR7          | OASL           |
| TREM2         | PIK3C2G        |
|               | TLR3           |

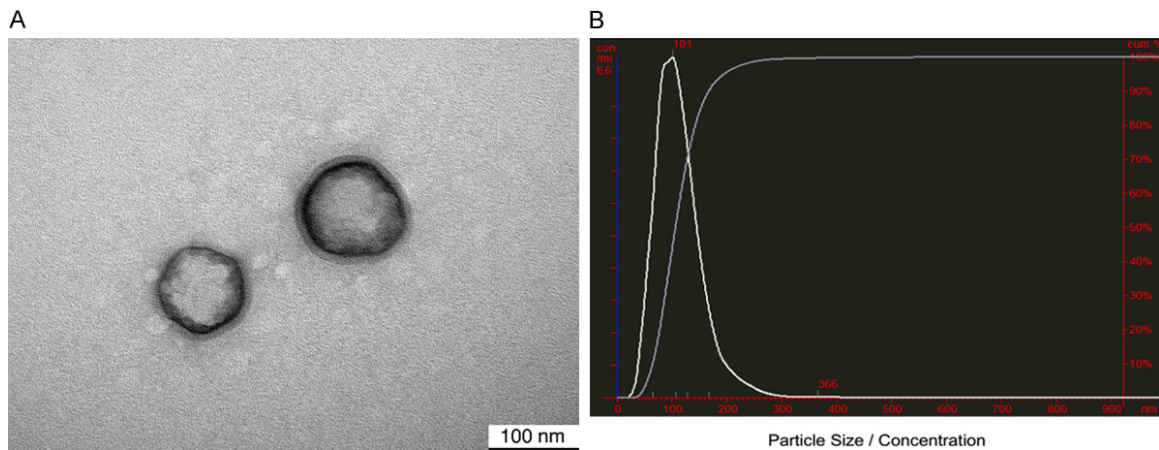

**Supplementary Figure 1.** EM picture and NTA analysis of the isolated exosomes of GC patients. A. Representative electron microscopic image of isolated exosomes at 150,000 $\times$  magnifications. These particles exhibited a spherical, membrane-bound characteristic. Scale bar represents 100 nm. B. Representative NTA plot showed the size and concentration distribution of particles in the plasma of GC patients, which shows a peak diameter of 101 nm.

## Exosomes and gastric cancer metastasis

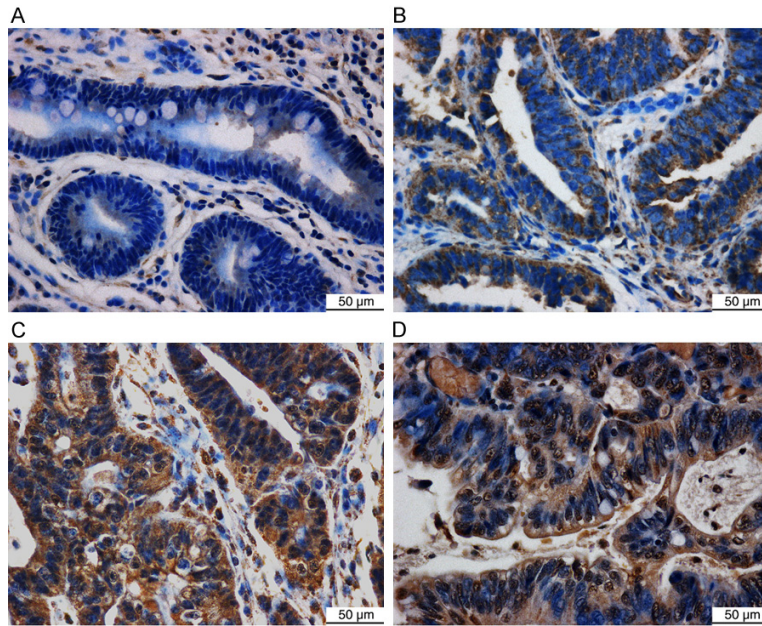

**Supplementary Figure 2.** Representative immunohistochemical staining of TGF- $\beta$ 1 in gastric cancers. (A) Stage I; (B) Stage II; (C) Stage III; (D) Stage IV. Bars represent 50  $\mu$ m.

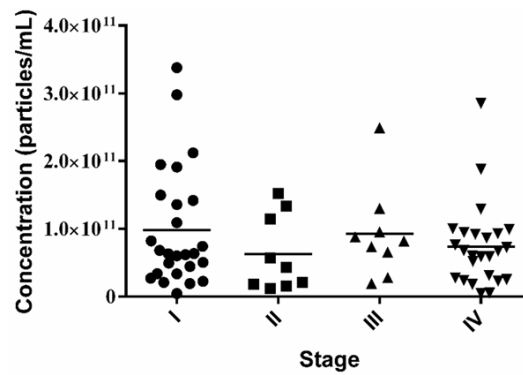

**Supplementary Figure 3.** The amount of exosomes released in different stages of gastric cancer. There was no difference between groups ( $p=0.4971$ ).
